# Supplementary material for: Why Are They Escaping? Factors Influencing Medical Student Migration Intentions in Egypt: A Cross-Sectional Study
Source: Research Square preprint supplement (doi:10.21203/rs.3.rs-6561892/v1), 2025-07-17
Supplement: Supplementary file 1 [file a7838d566e229443be38fb0e.pdf]

# Project Questionnaire

The questionnaire used in this study was developed specifically for the purpose of this research. The English version of the questionnaire is included as a supplementary file. This questionnaire was designed to assess factors influencing medical students' intentions to migrate, including financial, workload, and sociopolitical factors.

## Factors motivating emigration among port said, Suez canal, and suez universities medical students

### Gender:

Male

Female

### Age:

### Educational Year:

### Social Level:

Low

Middle

High

### Place of residence:

Urban

|                                                                             | Yes | No |
|-----------------------------------------------------------------------------|-----|----|
| Do you wish to migrate                                                      |     |    |
| Will you change your decision if the health sector improved                 |     |    |
| <b>Financial factors</b>                                                    | Yes | No |
| a. Are you satisfied with physician's salary                                |     |    |
| b. Salary is appropriate for risks?                                         |     |    |
| c. Is salary appropriate for work hours                                     |     |    |
| d. Need to work extra time in private hospital because salary is inadequate |     |    |
| e. Do you want to emigrate because salary is inadequate                     |     |    |
| <b>WorkLoad</b>                                                             | Yes | No |
| a. Work hours per week are reasonable                                       |     |    |
| b. Work hours leave enough time for family                                  |     |    |
| c. Work hours leave enough time for hobbies and activities                  |     |    |
| <b>Sociopolitical factors</b>                                               | Yes | No |
| a. Doctors get enough appreciation from society                             |     |    |
| b. Doctors get enough appreciation from the government?                     |     |    |
| c. Media negatively affect physicians regarding medical errors              |     |    |

Rural

Answer according to the following grades:

|                      |              |                  |
|----------------------|--------------|------------------|
| 1- Totally satisfied | 2- Satisfied | 3- Not satisfied |
|----------------------|--------------|------------------|

|    |                                                         | 1 | 2 | 3 |
|----|---------------------------------------------------------|---|---|---|
| a. | Are you satisfied with relationship with patients       |   |   |   |
| b. | Are you satisfied with relationships with colleagues    |   |   |   |
| c. | Are you satisfied with relationships with nursing staff |   |   |   |

| Have you experienced any of the following types of abuse in the hospital |                                                  | Yes | No |
|--------------------------------------------------------------------------|--------------------------------------------------|-----|----|
| a.                                                                       | Verbal abuse                                     |     |    |
| b.                                                                       | Physical assault                                 |     |    |
| c.                                                                       | Privacy violation                                |     |    |
| d.                                                                       | Patients neglect physicians instructions         |     |    |
| e.                                                                       | Workplace is safe                                |     |    |
| f.                                                                       | Administrative procedures negatively affect work |     |    |
| g.                                                                       | Job autonomy                                     |     |    |

### Factors driving Egyptian medical students to work abroad

| <b>Which of the following factors motivate your desire to emigrate</b> |                                            |     |    |
|------------------------------------------------------------------------|--------------------------------------------|-----|----|
| <b>Push factors in Egypt</b>                                           |                                            | Yes | No |
| a.                                                                     | Low quality standards in the health sector |     |    |

|                     |                                                      |     |    |
|---------------------|------------------------------------------------------|-----|----|
| b.                  | Relatively low income of doctors                     |     |    |
| c.                  | Favoritism                                           |     |    |
| d.                  | Low level of appreciation of doctors                 |     |    |
| e.                  | Lack of research funding                             |     |    |
| f.                  | Lack of good education for participants' children    |     |    |
| g.                  | Unavailability of the specialty of interest          |     |    |
| h.                  | More competition                                     |     |    |
| Pull factors abroad |                                                      | Yes | No |
| i.                  | Access to advanced medical technologies              |     |    |
| j.                  | Better lifestyle                                     |     |    |
| k.                  | Better working environment                           |     |    |
| l.                  | Self-actualization                                   |     |    |
| m.                  | High salaries                                        |     |    |
| n.                  | More stable political circumstances                  |     |    |
| o.                  | Better professional stability                        |     |    |
| p.                  | High job satisfaction                                |     |    |
| q.                  | Desire to settle abroad                              |     |    |
| r.                  | More job opportunities                               |     |    |
| s.                  | Obtaining the citizenship of the destination country |     |    |
